# Supplementary material for: Metal ion-dependent structural phase transition and impact of the Jahn–Teller effect in two organic–inorganic hybrid compounds
Source: Royal Society of Chemistry journal article supplement (doi:10.1039/d4tc01471e), 2024-01-01
Supplement: d4tc01471e1.pdf [file d4tc01471e1.pdf]

## Supporting information

### Metal ion-dependent structural phase transition and impact of Jahn-Teller effect in two organic-inorganic hybrid compounds

Shi-Qing Yin, Yu-Qiao Tong, Qian-Jun Gu, Ya-Juan Li, Bo Huang\* and Ai-Xin Zhu\*

Faculty of Chemistry and Chemical Engineering, Yunnan Normal University, Kunming 650500, China.

#### Table of Contents

|                                                                                                                     |     |
|---------------------------------------------------------------------------------------------------------------------|-----|
| 1. Materials and instrumentations. ....                                                                             | S2  |
| 2. Synthesis.....                                                                                                   | S2  |
| 3. Table S1. Crystallographic data and structural refinements.....                                                  | S3  |
| 4. Table S2. Selected bond lengths.....                                                                             | S4  |
| 5. Table S3. Selected bond angles .....                                                                             | S5  |
| 6. Table S4. Geometry of hydrogen bonds .....                                                                       | S8  |
| 7. Fig. S1 Infrared spectra .....                                                                                   | S12 |
| 8. Fig. S2 Powder X-ray diffraction .....                                                                           | S12 |
| 9. Fig. S3 Thermogravimetric curves .....                                                                           | S12 |
| 10. Fig. S4 Twisting motion of the (H <sub>2</sub> dabco) <sup>+</sup> cations of <b>1-Mn</b> .....                 | S13 |
| 11. Fig. S5 The five different [Cu(H <sub>2</sub> O) <sub>6</sub> ] <sup>2+</sup> octahedra of <b>1-Cu</b> .....    | S13 |
| 12. Fig. S6 The pack structures viewed along the <i>c</i> -axis .....                                               | S13 |
| 13. Fig. S7 Imaginary part of the dielectric permittivity measured with crystals parallel to the largest face ..... | S14 |
| 14. Fig. S8 Dielectric permittivity measured with crystals perpendicular to largest face .....                      | S14 |
| 15. Fig. S9 Dielectric permittivity measured with powder-pressed samples .....                                      | S15 |
| 16. Fig. S10 Two heating-cooling cycles of the dielectric constant .....                                            | S15 |

**Materials and instrumentations.** All chemicals were obtained from commercial sources and used without further purification. Infrared spectra were performed on a Bruker Tensor 27 spectrometer using KBr particles. Powder X-Ray diffraction (PXRD) patterns (Cu-K $\alpha$ ,  $\lambda = 1.54056 \text{ \AA}$ ) were collected on a Smartlab9  $\vartheta$ - $2\vartheta$  diffractometer. Thermogravimetric (TG) analysis was carried out on a Bruker APEX DUO II system at a heating rate of 5 K/min under a N<sub>2</sub> atmosphere. Differential scanning calorimetry (DSC) measurement was performed by cooling-heating the powder sample at a rate of 5 K/min on a TA DSC Q2000 instrument. Single-crystal X-ray data were performed on Bruker D8 VENTURE Ius 3.0 diffractometer with Mo-K $\alpha$  radiation ( $\lambda = 0.71073 \text{ \AA}$ ), and the structures were solved by direct methods and refined by the full-matrix least-squares refinements based on  $F^2$  using the SHELXLTL software package.<sup>1</sup> The complex permittivity ( $\epsilon = \epsilon' - i\epsilon''$ ,  $\epsilon'$  is the real part, and  $\epsilon''$  is the imaginary part) were measured using a Tonghui TH2838A LCR meter (applied electric field of 1.0 V) connected to a cryogenic environment controller at a rate of about 3 K/min at various frequencies (1, 2, 4, 6, 8, 10, 20, 40, 60, 80, 100, 200, 400, 600, 800, 10000 kHz). Second harmonic generation (SHG) was measured using a WITec alpha 300RS microscope with a 1064 nm laser. The evolution of the ferroelastic domain was performed in a Leica DM4P polarising microscope.

**Synthesis.** A water solution containing stoichiometric quantities of dabco (dabco = 1,2-diazabicyclo[2.2.2]octane, 1.12 g, 10 mmol), 30.0 wt% H<sub>2</sub>SiF<sub>6</sub> (2.6 mL, 20 mmol), and MnCO<sub>3</sub> (1.15 g, 10 mmol) /CuCO<sub>3</sub> (1.24 g, 10 mmol) were stirred for about 30 minutes, respectively. The clear solutions were allowed to stand at room temperature for slow evaporation. After about one week, colorless and blue crystals of (C<sub>6</sub>H<sub>14</sub>N<sub>2</sub>)[Mn(H<sub>2</sub>O)<sub>6</sub>][SiF<sub>6</sub>]<sub>2</sub> (**1-Mn**) and (C<sub>6</sub>H<sub>14</sub>N<sub>2</sub>)[Cu(H<sub>2</sub>O)<sub>6</sub>][SiF<sub>6</sub>]<sub>2</sub> (**1-Cu**) were obtained in about 85% and 82% yield based on Mn and Cu, respectively. The phase purity of **1-Mn** and **1-Cu** were verified by infrared (IR) spectra measurements (Fig. S1) and powder X-Ray diffraction patterns which matching well with the simulated one in terms of the single-crystal structures (Fig. S2). Elemental analyses: For **1-Mn** calcd C: 12.84%, N: 4.99%, H: 4.67%; found C: 13.04%, N: 5.06%, H: 4.64%. For **1-Cu** calcd C: 12.67%, N: 4.93%, H: 4.37%; found C: 12.77%, N: 4.76%, H: 4.52%.

**Table S1.** Summary of crystallographic data and structural refinements for **1-Mn** and **1-Cu** at 173 and 293 K.

| Empirical formula                                                                        | $(C_6H_{14}N_2)[Mn(H_2O)_6][SiF_6]_2$ |                | $(C_6H_{14}N_2)[Cu(H_2O)_6][SiF_6]_2$ |                |
|------------------------------------------------------------------------------------------|---------------------------------------|----------------|---------------------------------------|----------------|
| Formula weight                                                                           | 561.40                                |                | 569.99                                |                |
| <i>T</i> / K                                                                             | 173                                   | 293            | 173                                   | 293            |
| Phase                                                                                    | LTP                                   | HTP            | LTP                                   | HTP            |
| Space group                                                                              | <i>R</i> 32                           | $R\bar{3}c$    | <i>C</i> 2/ <i>c</i>                  | $R\bar{3}c$    |
| <i>a</i> / Å                                                                             | 9.330(3)                              | 9.457(1)       | 15.9780(2)                            | 9.3490(9)      |
| <i>b</i> / Å                                                                             | 9.330(3)                              | 9.457(1)       | 27.7885(3)                            | 9.3490(9)      |
| <i>c</i> / Å                                                                             | 38.34(1)                              | 38.660(8)      | 38.1976(5)                            | 38.422(5)      |
| $\alpha$ / degree                                                                        | 90                                    | 90             | 90                                    | 90             |
| $\beta$ / degree                                                                         | 90                                    | 90             | 90.264(1)                             | 90             |
| $\gamma$ / degree                                                                        | 120                                   | 120            | 90                                    | 120            |
| <i>V</i> / Å <sup>3</sup>                                                                | 2890(2)                               | 2994(1)        | 16959.7(4)                            | 2908.3(7)      |
| <i>Z</i>                                                                                 | 6                                     | 6              | 36                                    | 6              |
| GOF                                                                                      | 1.101                                 | 1.174          | 1.229                                 | 1.099          |
| <i>R</i> <sub>1</sub> , <i>wR</i> <sub>2</sub> [ <i>I</i> > 2σ( <i>I</i> )] <sup>a</sup> | 0.0332, 0.0880                        | 0.0595, 0.1516 | 0.0400, 0.0865                        | 0.0532, 0.1626 |
| <i>R</i> <sub>1</sub> , <i>wR</i> <sub>2</sub> (all data)                                | 0.0340, 0.0889                        | 0.0618, 0.1549 | 0.0462, 0.0883                        | 0.0547, 0.1643 |
| Flack parameter                                                                          | 0.42(4)                               | –              | –                                     | –              |

$$^a R_1 = F_o - F_c / F_o, wR_2 = \{w[(F_o)^2 - (F_c)^2] / w[(F_o)^2]\}^{1/2}$$

**Table S2.** The selected bond lengths (Å) of **1-Mn** and **1-Cu** at 173 and 293 K.

|             |       |                     |                     |                     |                     |          |
|-------------|-------|---------------------|---------------------|---------------------|---------------------|----------|
| <b>1-Mn</b> | 173 K | Mn1–O1              | 2.141(2)            | Mn1–O1 <sup>1</sup> | 2.141(2)            |          |
|             |       | Mn1–O1 <sup>2</sup> | 2.141(2)            | Mn–O2               | 2.166(2)            |          |
|             |       | Mn–O2 <sup>1</sup>  | 2.166(2)            | Mn–O2 <sup>2</sup>  | 2.166(2)            |          |
|             | 293 K | Mn1–O1              | 2.146(3)            | Mn1–O1 <sup>1</sup> | 2.146(3)            |          |
|             |       | Mn1–O1 <sup>2</sup> | 2.146(3)            | Mn1–O1 <sup>3</sup> | 2.146(3)            |          |
|             |       | Mn1–O1 <sup>4</sup> | 2.146(3)            | Mn1–O1 <sup>5</sup> | 2.146(3)            |          |
| <b>1-Cu</b> | 173 K | Cu1–O1              | 1.997(2)            | Cu1–O1 <sup>1</sup> | 1.997(2)            |          |
|             |       | Cu1–O2              | 2.247(2)            | Cu1–O2 <sup>1</sup> | 2.247(2)            |          |
|             |       | Cu1–O3              | 1.967(2)            | Cu1–O3 <sup>1</sup> | 1.967(2)            |          |
|             |       | Cu2–O4              | 2.017(2)            | Cu2–O5              | 1.984(2)            |          |
|             |       | Cu2–O6              | 2.256(2)            | Cu2–O7              | 1.993(2)            |          |
|             |       | Cu2–O8              | 1.981(2)            | Cu2–O9              | 2.251(2)            |          |
|             |       | Cu3–O10             | 1.973(2)            | Cu3–O11             | 2.010(2)            |          |
|             |       | Cu3–O12             | 2.232(2)            | Cu3–O13             | 1.990(2)            |          |
|             |       | Cu3–O14             | 2.044(2)            | Cu3–O15             | 2.229(2)            |          |
|             |       | Cu4–O16             | 1.994(2)            | Cu4–O17             | 1.979(2)            |          |
|             |       | Cu4–O18             | 2.231(2)            | Cu4–O19             | 1.995(2)            |          |
|             |       | Cu4–O20             | 1.968(2)            | Cu4–O21             | 2.245(2)            |          |
|             |       | Cu5–O22             | 1.983(2)            | Cu5–O23             | 2.237(2)            |          |
|             |       | Cu5–O24             | 2.012(2)            | Cu5–O25             | 2.040(2)            |          |
|             |       | Cu5–O25             | 2.229(2)            | Cu5–O27             | 1.973(2)            |          |
|             |       | 293 K               | Cu1–O1              | 2.046(3)            | Cu1–O1 <sup>1</sup> | 2.045(3) |
|             |       |                     | Cu1–O1 <sup>2</sup> | 2.045(3)            | Cu1–O1 <sup>3</sup> | 2.045(4) |
|             |       |                     | Cu1–O1 <sup>4</sup> | 2.045(3)            | Cu1–O1 <sup>5</sup> | 2.045(4) |

Symmetry code

**1-Mn**173 K: <sup>1</sup>1-y, +x-y, +z; <sup>2</sup>1+y-x, 1-x, +z;293 K: <sup>4</sup>4/3-x, 2/3-y, 5/3-z; <sup>2</sup>1/3+y+x, -1/3+x, 5/3-z; <sup>3</sup>1/3+y, 2/3-x+y, 5/3-z; <sup>4</sup>1-y, +x-y, +z; <sup>5</sup>1+y-x, 1-x, +z;**1-Cu**173 K: <sup>1</sup>1-x, -y, 1-z;293 K: <sup>1</sup>1-y, +x-y, +z; <sup>2</sup>1/3+y, 2/3-x+y, 5/3-z; <sup>3</sup>1+y-x, 1-x, +z; <sup>4</sup>4/3-x, 2/3-y, 5/3-z; <sup>5</sup>1/3-y+x, -1/3+x, 5/3-z;

**Table S3.** The selected bond angles (°) of **1-Mn** and **1-Cu** at 173 and 293 K.

---

|                        |       |                        |          |                        |          |
|------------------------|-------|------------------------|----------|------------------------|----------|
| <b>1-Mn</b>            | 173 K | $\angle O1-Mn1-O1^1$   | 88.33(9) | $\angle O1-Mn1-O1^2$   | 88.33(9) |
|                        |       | $\angle O1-Mn1-O2$     | 88.37(9) | $\angle O1-Mn1-O2^1$   | 175.5(1) |
|                        |       | $\angle O1-Mn1-O2^2$   | 94.6(1)  | $\angle O1^1-Mn1-O1^2$ | 88.33(9) |
|                        |       | $\angle O1^1-Mn1-O2$   | 94.6(1)  | $\angle O1^1-Mn1-O2^1$ | 88.37(9) |
|                        |       | $\angle O1^1-Mn1-O2^2$ | 175.5(1) | $\angle O1^2-Mn1-O2$   | 175.5(1) |
|                        |       | $\angle O1^2-Mn1-O2^1$ | 94.6(1)  | $\angle O1^2-Mn1-O2^2$ | 88.37(9) |
|                        |       | $\angle O2-Mn1-O2^1$   | 88.89(8) | $\angle O2-Mn1-O2^2$   | 88.89(8) |
|                        |       | $\angle O2^1-Mn1-O2^2$ | 88.89(8) |                        |          |
|                        | 293 K | $\angle O1-Mn1-O1^1$   | 180.0    | $\angle O1-Mn1-O1^2$   | 91.8(1)  |
|                        |       | $\angle O1-Mn1-O1^3$   | 88.3(10) | $\angle O1-Mn1-O1^4$   | 88.3(1)  |
|                        |       | $\angle O1-Mn1-O1^5$   | 91.8(1)  | $\angle O1^1-Mn1-O1^2$ | 88.2(1)  |
|                        |       | $\angle O1^1-Mn1-O1^3$ | 91.8(1)  | $\angle O1^1-Mn1-O1^4$ | 91.8(1)  |
|                        |       | $\angle O1^1-Mn1-O1^5$ | 88.3(1)  | $\angle O1^2-Mn1-O1^3$ | 91.8(1)  |
|                        |       | $\angle O1^2-Mn1-O1^4$ | 180.0(2) | $\angle O1^2-Mn1-O1^5$ | 88.3(1)  |
|                        |       | $\angle O1^3-Mn1-O1^4$ | 88.3(1)  | $\angle O1^3-Mn1-O1^5$ | 180.0(2) |
| $\angle O1^4-Mn1-O1^5$ |       | 91.8(1)                |          |                        |          |
| <b>1-Cu</b>            | 173 K | $\angle O1-Cu1-O1^1$   | 180.0(2) | $\angle O1-Cu1-O2$     | 90.77(9) |
|                        |       | $\angle O1-Cu1-O2^1$   | 89.23(9) | $\angle O1-Cu1-O3$     | 88.66(9) |
|                        |       | $\angle O1-Cu1-O3^1$   | 91.34(9) | $\angle O1^1-Cu1-O2$   | 89.23(9) |
|                        |       | $\angle O1^1-Cu1-O2^1$ | 90.77(9) | $\angle O1^1-Cu1-O3$   | 91.34(9) |
|                        |       | $\angle O1^1-Cu1-O3^1$ | 88.66(9) | $\angle O2-Cu1-O2^1$   | 180.0(1) |
|                        |       | $\angle O2-Cu1-O3$     | 89.97(9) | $\angle O2-Cu1-O3^1$   | 90.03(9) |

---

---

|                          |           |                                       |           |
|--------------------------|-----------|---------------------------------------|-----------|
| ∠O2 <sup>1</sup> -Cu1-O3 | 90.03(9)  | ∠O2 <sup>1</sup> -Cu1-O3 <sup>1</sup> | 89.97(9)  |
| ∠O3-Cu1-O3 <sup>1</sup>  | 180.0(1)  | ∠O4-Cu2-O5                            | 90.54(9)  |
| ∠O4-Cu2-O6               | 89.67(8)  | ∠O4-Cu2-O7                            | 179.00(9) |
| ∠O4-Cu2-O8               | 90.55(9)  | ∠O4-Cu2-O9                            | 88.15(8)  |
| ∠O5-Cu2-O6               | 91.07(8)  | ∠O5-Cu2-O7                            | 88.72(9)  |
| ∠O5-Cu2-O8               | 178.28(9) | ∠O5-Cu2-O9                            | 91.37(8)  |
| ∠O6-Cu2-O7               | 89.67(9)  | ∠O6-Cu2-O8                            | 90.27(8)  |
| ∠O6-Cu2-O9               | 176.74(8) | ∠O7-Cu2-O8                            | 90.20(9)  |
| ∠O7-Cu2-O9               | 92.54(8)  | ∠O8-Cu2-O9                            | 87.33(9)  |
| ∠O10-Cu3-O11             | 90.27(9)  | ∠O10-Cu3-O12                          | 90.34(9)  |
| ∠O10-Cu3-O13             | 178.04(9) | ∠O10-Cu3-O14                          | 90.71(9)  |
| ∠O10-Cu3-O15             | 87.35(9)  | ∠O11-Cu3-O12                          | 89.16(9)  |
| ∠O11-Cu3-O13             | 88.56(9)  | ∠O11-Cu3-O14                          | 177.95(9) |
| ∠O11-Cu3-O15             | 93.60(9)  | ∠O12-Cu3-O13                          | 91.21(9)  |
| ∠O12-Cu3-O14             | 89.03(9)  | ∠O12-Cu3-O15                          | 176.41(8) |
| ∠O13-Cu3-O14             | 90.50(8)  | ∠O13-Cu3-O15                          | 91.15(8)  |
| ∠O14-Cu3-O15             | 88.25(9)  | ∠O16-Cu4-O17                          | 91.26(9)  |
| ∠O16-Cu4-O18             | 92.36(9)  | ∠O16-Cu4-O19                          | 88.74(9)  |
| ∠O16-Cu4-O20             | 178.66(9) | ∠O16-Cu4-O21                          | 88.21(8)  |
| ∠O17-Cu4-O18             | 89.50(9)  | ∠O17-Cu4-O19                          | 179.4(1)  |
| ∠O17-Cu4-O20             | 89.43(9)  | ∠O17-Cu4-O21                          | 89.09(9)  |
| ∠O18-Cu4-O19             | 89.86(9)  | ∠O18-Cu4-O20                          | 88.79(9)  |
| ∠O18-Cu4-O21             | 178.49(9) | ∠O19-Cu4-O20                          | 90.58(9)  |

---

---

|       |                        |           |                        |           |
|-------|------------------------|-----------|------------------------|-----------|
|       | $\angle O19-Cu4-O21$   | 91.55(9)  | $\angle O20-Cu4-O21$   | 90.65(9)  |
|       | $\angle O22-Cu5-O23$   | 91.43(8)  | $\angle O22-Cu5-O24$   | 88.52(9)  |
|       | $\angle O22-Cu5-O25$   | 90.51(9)  | $\angle O22-Cu5-O26$   | 90.91(8)  |
|       | $\angle O22-Cu5-O27$   | 178.34(9) | $\angle O23-Cu5-O24$   | 92.83(9)  |
|       | $\angle O23-Cu5-O25$   | 88.40(8)  | $\angle O23-Cu5-O26$   | 176.65(8) |
|       | $\angle O23-Cu5-O27$   | 87.11(8)  | $\angle O24-Cu5-O25$   | 178.45(9) |
|       | $\angle O24-Cu5-O26$   | 89.62(9)  | $\angle O24-Cu5-O27$   | 90.76(9)  |
|       | $\angle O25-Cu5-O26$   | 89.18(9)  | $\angle O25-Cu5-O27$   | 90.24(9)  |
|       | $\angle O26-Cu5-O27$   | 90.58(9)  |                        |           |
| 293 K | $\angle O1-Cu1-O1^1$   | 89.6(1)   | $\angle O1-Cu1-O1^2$   | 89.6(1)   |
|       | $\angle O1-Cu1-O1^3$   | 90.4(1)   | $\angle O1-Cu1-O1^4$   | 90.4(1)   |
|       | $\angle O1-Cu1-O1^5$   | 180.0     | $\angle O1^1-Cu1-O1^2$ | 89.6(1)   |
|       | $\angle O1^1-Cu1-O1^3$ | 180.0     | $\angle O1^1-Cu1-O1^4$ | 90.4(1)   |
|       | $\angle O1^1-Cu1-O1^5$ | 90.4(1)   | $\angle O1^2-Cu1-O1^3$ | 90.4(1)   |
|       | $\angle O1^2-Cu1-O1^4$ | 180.0     | $\angle O1^2-Cu1-O1^5$ | 90.4(1)   |
|       | $\angle O1^3-Cu1-O1^4$ | 89.6(1)   | $\angle O1^3-Cu1-O1^5$ | 89.6(1)   |
|       | $\angle O1^4-Cu1-O1^5$ | 89.6(1)   |                        |           |

---

Symmetry code

**1-Mn**

173 K:  $^11-y, +x-y, +z; ^21+y-x, 1-x, +z;$

293 K:  $^44/3-x, 2/3-y, 5/3-z; ^21/3+y, 2/3-x+y, 5/3-z; ^31+y-x, 1-x, +z; ^41-y, +x-y, +z; ^51/3-y+x, -1/3+x, 5/3-z;$

**1-Cu**

173 K:  $^11-x, -y, 1-z; ^21-x, +y, 1/2-z;$

293 K:  $^11-y, +x-y, +z; ^21+y-x, 1-x, +z; ^31/3+y, 2/3-x+y, 5/3-z; ^41/3-y+x, -1/3+x, 5/3-z; ^54/3-x, 2/3-y, 5/3-z;$

**Table S4.** The geometry (Å, °) of hydrogen bonds for **1-Mn** and **1-Cu** at 173 and 293 K.

|                           |                           | D–H...A                  | D–H   | H...A  | D...A  | ∠D–H...A |
|---------------------------|---------------------------|--------------------------|-------|--------|--------|----------|
| <b>1-Mn</b>               | 173 K                     | N1–H1...F4 <sup>1</sup>  | 0.980 | 2.125  | 2.947  | 140.38   |
|                           |                           | N1–H1...F4 <sup>2</sup>  | 0.980 | 2.125  | 2.947  | 140.39   |
|                           |                           | N1–H1...F4 <sup>3</sup>  | 0.980 | 2.125  | 2.947  | 140.38   |
|                           |                           | N2–H2...F1 <sup>4</sup>  | 0.980 | 2.119  | 2.939  | 140.19   |
|                           |                           | N2–H2...F1 <sup>5</sup>  | 0.980 | 2.118  | 2.939  | 140.19   |
|                           |                           | N2–H2...F1 <sup>6</sup>  | 0.980 | 2.119  | 2.939  | 140.19   |
|                           |                           | O1–H1A...F3 <sup>7</sup> | 0.848 | 2.513  | 2.994  | 116.94   |
|                           |                           | O1–H1A...F4 <sup>8</sup> | 0.848 | 1.846  | 2.693  | 177.72   |
|                           |                           | O1–H1B...F3              | 0.834 | 1.900  | 2.682  | 155.80   |
|                           |                           | O2–H2A...F2 <sup>9</sup> | 0.845 | 2.518  | 2.995  | 116.75   |
|                           | O2–H2A...F1 <sup>10</sup> | 0.845                    | 1.898 | 2.726  | 165.97 |          |
|                           | O2–H2B...F2               | 0.840                    | 1.888 | 2.721  | 171.25 |          |
|                           | 293 K                     | N1–H1...F2               | 0.980 | 2.133  | 2.956  | 140.49   |
|                           |                           | N1–H1...F2 <sup>1</sup>  | 0.980 | 2.133  | 2.956  | 140.50   |
|                           |                           | N1–H1...F2 <sup>2</sup>  | 0.980 | 2.133  | 2.956  | 140.49   |
|                           |                           | N1–H1...F2'              | 0.980 | 2.145  | 2.974  | 141.39   |
|                           |                           | N1–H1...F2' <sup>1</sup> | 0.980 | 2.145  | 2.974  | 141.39   |
|                           |                           | N1–H1...F2' <sup>2</sup> | 0.980 | 2.145  | 2.974  | 141.39   |
|                           |                           | O1–H1C...F1 <sup>3</sup> | 0.854 | 1.855  | 2.703  | 171.97   |
| O1–H1C...F1' <sup>3</sup> |                           | 0.854                    | 2.003 | 2.709  | 139.40 |          |
| O1–H1C...F1' <sup>4</sup> |                           | 0.854                    | 2.514 | 3.304  | 154.22 |          |
| O1–H1D...F2' <sup>4</sup> | 0.854                     | 2.257                    | 2.745 | 116.38 |        |          |
| <b>1-Cu</b>               | 173 K                     | N1–H1–F31 <sup>1</sup>   | 1.000 | 2.026  | 2.901  | 144.90   |
|                           |                           | N1–H1–F33 <sup>1</sup>   | 1.000 | 2.362  | 3.109  | 130.82   |
|                           |                           | N1–H1–F35 <sup>1</sup>   | 1.000 | 2.008  | 2.856  | 141.12   |
|                           |                           | N2–H2–F8                 | 1.000 | 2.204  | 3.021  | 137.90   |
|                           |                           | N2–H2–F10                | 1.000 | 2.128  | 2.964  | 139.88   |
|                           |                           | N2–H2–F11                | 1.000 | 2.066  | 2.919  | 141.90   |
|                           |                           | N3–H3–F4                 | 1.000 | 2.156  | 2.949  | 134.98   |
|                           |                           | N3–H3–F5                 | 1.000 | 1.947  | 2.848  | 148.41   |
|                           |                           | N3–H3–F6                 | 1.000 | 2.249  | 3.031  | 134.00   |
|                           |                           | N4–H4–F21                | 1.000 | 2.228  | 3.020  | 135.11   |
|                           |                           | N4–H4–F22                | 1.000 | 2.023  | 2.891  | 143.80   |
|                           |                           | N4–H4–F23                | 1.000 | 2.084  | 2.915  | 139.19   |



---

|                           |       |       |       |        |
|---------------------------|-------|-------|-------|--------|
| N5-H5-F49 <sup>2</sup>    | 1.000 | 2.162 | 2.994 | 139.54 |
| N5-H5-F50 <sup>2</sup>    | 1.000 | 2.245 | 3.033 | 134.63 |
| N5-H5-F53 <sup>2</sup>    | 1.000 | 1.973 | 2.847 | 144.51 |
| N6-H6-F25 <sup>3</sup>    | 1.000 | 2.172 | 2.992 | 138.15 |
| N6-H6-F26 <sup>3</sup>    | 1.000 | 2.057 | 2.910 | 141.92 |
| N6-H6-F30 <sup>3</sup>    | 1.000 | 2.118 | 2.944 | 138.65 |
| N7-H7-F13 <sup>4</sup>    | 1.000 | 2.227 | 3.026 | 135.84 |
| N7-H7-F14 <sup>4</sup>    | 1.000 | 2.159 | 2.973 | 137.45 |
| N7-H7-F15 <sup>4</sup>    | 1.000 | 2.020 | 2.904 | 146.17 |
| N8-H8-F43                 | 1.000 | 2.185 | 3.001 | 137.71 |
| N8-H8-F47                 | 1.000 | 2.070 | 2.909 | 140.12 |
| N8-H8-F48                 | 1.000 | 2.095 | 2.936 | 140.45 |
| N9-H9-F39                 | 1.000 | 2.265 | 3.035 | 132.86 |
| N9-H9-F40                 | 1.000 | 1.956 | 2.827 | 144.07 |
| N9-H9-F41                 | 1.000 | 2.128 | 2.970 | 140.72 |
| O15-H15C-F28              | 0.807 | 1.956 | 2.742 | 164.58 |
| O15-H15C-F28 <sup>3</sup> | 0.807 | 2.573 | 2.973 | 112.21 |
| O10-H10A-F18              | 0.728 | 1.959 | 2.682 | 171.32 |
| O27-H27A-F37 <sup>3</sup> | 0.796 | 2.599 | 3.053 | 117.85 |
| O27-H27A-F39 <sup>3</sup> | 0.796 | 1.881 | 2.675 | 175.49 |
| O24-H24C-F51              | 0.806 | 1.855 | 2.655 | 171.12 |
| O22-H22C-F45 <sup>5</sup> | 0.821 | 2.521 | 2.971 | 115.69 |
| O22-H22C-F47 <sup>5</sup> | 0.821 | 1.910 | 2.725 | 171.45 |
| O19-H19C-F49 <sup>3</sup> | 0.821 | 1.886 | 2.704 | 174.59 |
| O19-H19C-F54 <sup>3</sup> | 0.821 | 2.636 | 3.091 | 116.51 |
| O6-H6C-F41 <sup>6</sup>   | 0.818 | 1.933 | 2.750 | 175.69 |
| O6-H6C-F42 <sup>6</sup>   | 0.818 | 2.600 | 3.093 | 120.13 |
| O12-H12A-F23              | 0.771 | 1.980 | 2.749 | 175.73 |
| O12-H12A-F24              | 0.771 | 2.561 | 3.032 | 121.14 |
| O13-H13C-F27              | 0.838 | 1.846 | 2.671 | 167.72 |
| O22-H22D-F45              | 0.794 | 1.902 | 2.691 | 172.13 |
| O24-H24D-F22 <sup>5</sup> | 0.746 | 1.918 | 2.661 | 173.66 |
| O14-H14C-F29              | 0.789 | 1.944 | 2.705 | 162.32 |
| O15-H15D-F28 <sup>3</sup> | 0.792 | 2.520 | 2.973 | 117.84 |
| O15-H15D-F30 <sup>3</sup> | 0.792 | 2.005 | 2.781 | 166.41 |
| O23-H23C-F27              | 0.866 | 2.526 | 2.947 | 110.81 |
| O23-H23C-F46              | 0.866 | 1.919 | 2.761 | 163.51 |

---

---

|                           |       |       |       |        |
|---------------------------|-------|-------|-------|--------|
| O27-H27B-F54              | 0.805 | 1.880 | 2.677 | 170.37 |
| O7-H7A-F5 <sup>3</sup>    | 0.752 | 1.933 | 2.662 | 163.11 |
| O26-H26A-F52              | 0.808 | 1.968 | 2.745 | 161.10 |
| O11-H11A-F40              | 0.833 | 1.847 | 2.678 | 175.23 |
| O4-H4C-F8 <sup>5</sup>    | 0.752 | 2.059 | 2.761 | 155.62 |
| O4-H4C-F9 <sup>5</sup>    | 0.752 | 2.637 | 3.045 | 116.19 |
| O26-H26B-F1 <sup>7</sup>  | 0.766 | 2.586 | 3.024 | 118.10 |
| O26-H26B-F4 <sup>7</sup>  | 0.766 | 2.009 | 2.770 | 172.81 |
| O6-H6D-F34 <sup>6</sup>   | 0.840 | 1.908 | 2.739 | 169.84 |
| O10-H10B-F3               | 0.909 | 2.589 | 3.081 | 114.65 |
| O10-H10B-F6               | 0.909 | 1.789 | 2.693 | 172.53 |
| O8-H8A-F19 <sup>5</sup>   | 0.834 | 2.625 | 3.050 | 113.07 |
| O8-H8A-F21 <sup>5</sup>   | 0.834 | 1.856 | 2.685 | 172.74 |
| O5-H5C-F43 <sup>6</sup>   | 0.799 | 1.957 | 2.731 | 163.14 |
| O5-H5C-F44 <sup>6</sup>   | 0.799 | 2.500 | 2.990 | 120.96 |
| O7-H7B-F32 <sup>6</sup>   | 0.864 | 1.783 | 2.642 | 173.05 |
| O8-H8B-F36 <sup>6</sup>   | 0.788 | 1.897 | 2.676 | 169.58 |
| O9-H9A-F29                | 0.805 | 2.525 | 2.957 | 115.07 |
| O9-H9A-F12                | 0.805 | 1.999 | 2.766 | 159.22 |
| O1-H1C-F32 <sup>8</sup>   | 0.817 | 2.528 | 2.922 | 110.91 |
| O1-H1C-F33 <sup>8</sup>   | 0.817 | 1.931 | 2.743 | 172.05 |
| O1-H1C-F15                | 0.865 | 1.906 | 2.765 | 172.05 |
| O12-H12B-F16              | 0.742 | 2.005 | 2.739 | 169.77 |
| O4-H4D-F9                 | 0.818 | 1.909 | 2.721 | 172.16 |
| O20-H20C-F34              | 0.769 | 2.624 | 3.043 | 116.15 |
| O20-H20C-F35              | 0.769 | 1.911 | 2.680 | 176.56 |
| O14-H14D-F10              | 0.832 | 1.977 | 2.791 | 165.95 |
| O18-H18C-F3 <sup>9</sup>  | 0.874 | 1.878 | 2.751 | 175.96 |
| O18-H18C-F36 <sup>9</sup> | 0.874 | 2.606 | 3.067 | 113.92 |
| O17-H17C-F14 <sup>4</sup> | 0.775 | 1.928 | 2.701 | 176.29 |
| O17-H17C-F16 <sup>4</sup> | 0.775 | 2.617 | 3.088 | 120.92 |
| O3-H3C-F53 <sup>2</sup>   | 0.837 | 1.862 | 2.696 | 174.58 |
| O21-H21C-F13              | 0.808 | 2.030 | 2.835 | 174.20 |
| O21-H21C-F17              | 0.808 | 2.549 | 2.959 | 112.85 |
| O11-H11B-F17              | 0.899 | 1.753 | 2.645 | 171.32 |
| O1-H1D-F2                 | 0.818 | 1.911 | 2.715 | 167.69 |
| O18-H18D-F19 <sup>1</sup> | 0.712 | 2.002 | 2.695 | 164.93 |

---

|       |                           |       |       |       |        |
|-------|---------------------------|-------|-------|-------|--------|
|       | O2-H2D-F3                 | 0.678 | 2.028 | 2.694 | 167.19 |
|       | O16-H16C-F20 <sup>1</sup> | 0.816 | 1.898 | 2.700 | 167.44 |
|       | O21-H21D-F38              | 0.767 | 1.999 | 2.733 | 159.91 |
|       | O20-H20D-F42              | 0.795 | 1.850 | 2.638 | 170.97 |
|       | O3-H3D-F1 <sup>10</sup>   | 0.835 | 1.814 | 2.630 | 165.50 |
|       | O16-H16D-F50 <sup>2</sup> | 0.854 | 1.904 | 2.758 | 177.65 |
|       | O16-H16D-F51 <sup>2</sup> | 0.854 | 2.499 | 2.988 | 117.20 |
|       | O9-H9B-F25                | 0.835 | 1.945 | 2.774 | 171.41 |
|       | O9-H9B-F29                | 0.835 | 2.499 | 2.957 | 115.52 |
|       | O13-H13D-F46              | 0.769 | 2.571 | 3.007 | 117.77 |
|       | O13-H13D-F48              | 0.769 | 2.024 | 2.744 | 155.76 |
|       | O19-H19D-F37              | 0.732 | 1.936 | 2.662 | 170.90 |
|       | O5-H5D-F7 <sup>6</sup>    | 0.734 | 1.958 | 2.690 | 175.74 |
|       | O25-H25A-F44              | 0.794 | 1.950 | 2.733 | 168.36 |
|       | O25-H25B-F7 <sup>6</sup>  | 0.856 | 2.500 | 3.033 | 121.15 |
|       | O25-H25B-F11 <sup>6</sup> | 0.856 | 1.952 | 2.775 | 160.78 |
|       | O17-H17D-F24 <sup>1</sup> | 0.806 | 1.853 | 2.643 | 166.17 |
|       | O23-H23D-F26              | 0.764 | 2.053 | 2.784 | 160.13 |
|       | O23-H23D-F27              | 0.764 | 2.540 | 2.947 | 115.16 |
| 293 K | O1-H1C-F2 <sup>1</sup>    | 0.867 | 2.182 | 2.741 | 121.92 |
|       | O1-H1D-F1                 | 0.867 | 1.881 | 2.676 | 151.62 |
|       | O1-H1D-F1 <sup>1</sup>    | 0.867 | 2.418 | 3.235 | 157.37 |
|       | O1-H1D-F1 <sup>12</sup>   | 0.867 | 2.279 | 2.766 | 115.55 |
|       | N1-H1-F2                  | 0.980 | 2.137 | 2.959 | 140.44 |
|       | N1-H1-F2 <sup>3</sup>     | 0.980 | 2.137 | 2.959 | 140.44 |
|       | N1-H1-F2 <sup>2</sup>     | 0.980 | 2.137 | 2.959 | 140.44 |

Symmetry code:

### 1-Mn

173 K: <sup>1</sup>x-y+2/3, -y+4/3, -z+1/3; <sup>2</sup>-x+5/3, -x+y+4/3, -z+1/3; <sup>3</sup>y+2/3, x+1/3, -z+1/3; <sup>4</sup>x-y, -y+1, -z; <sup>5</sup>-x+1, -x+y+1, -z; <sup>6</sup>y, x, -z; <sup>7</sup>y+2/3, x-2/3, -z+1/3; <sup>8</sup>x-y+2/3, -y+1/3, -z+1/3; <sup>9</sup>-x+2, -x+y+1, -z; <sup>10</sup>x-y+1, -y+1, -z;

293 K: <sup>1</sup>-y+1, x-y, z; <sup>2</sup>-x+y+1, -x+1, z; <sup>3</sup>y+1/3, -x+y+2/3, -z+5/3; <sup>4</sup>x+1/3, x-y+2/3, z+1/6;

### 1-Cu

173 K: 1-x+3/2, -y+1/2, -z+1; 2x-1/2, -y+1/2, z+1/2; 3-x+1, y, -z+1/2; 4-x+3/2, -y+1/2, -z+1; 5-x+2, y, -z+1/2; 6-x+3/2, y-1/2, -z+1/2; 7-x+3/2, y+1/2, -z+1/2; 8x-1/2, y-1/2, z; 9-x+1, -y+1, -z+1; 10-x+1, -y, -z+1;

293 K: <sup>1</sup>y, x, -z+3/2; <sup>2</sup>-x+y+1, -x+1, z; <sup>3</sup>-y+1, x-y, z

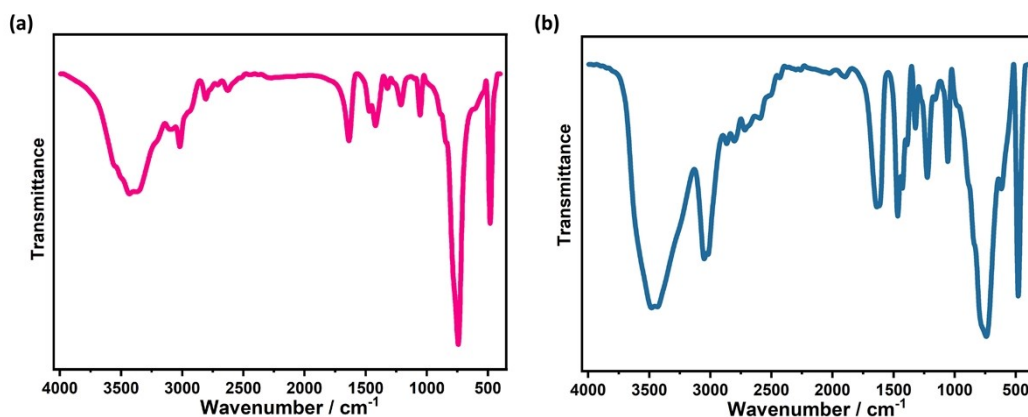

**Fig S1** IR spectra of **1-Mn** (a) and **1-Cu** (b).

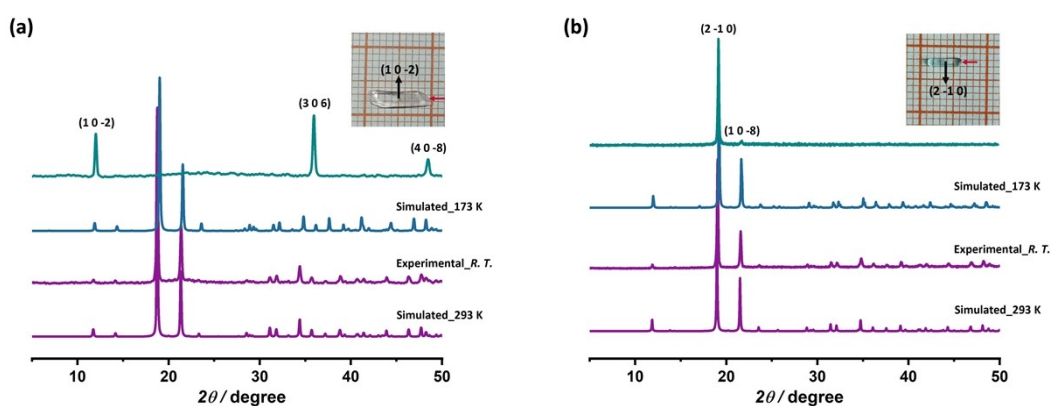

**Fig. S2** The powder XRD patterns of **1-Mn** (a) and **1-Cu** (b) for the simulated at 173 K and 293 K, experimental at room temperature, and single crystals of the largest face (black arrows), respectively.

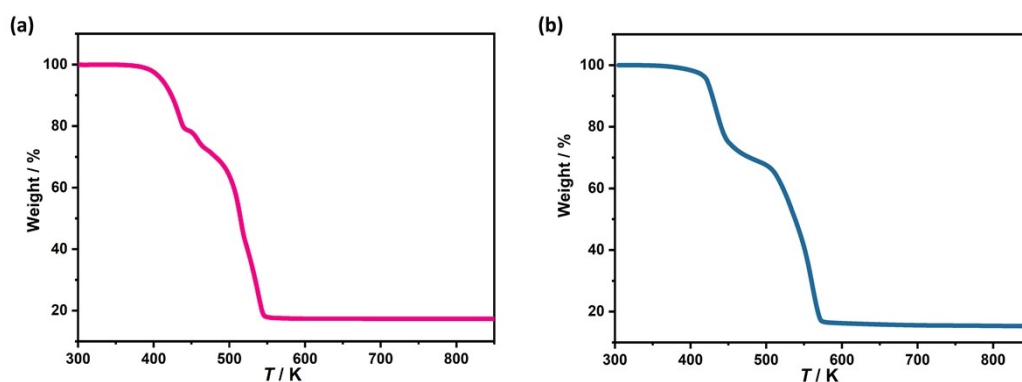

**Fig. S3** TG curves measured at a rate of 5 K/min under N<sub>2</sub> atmosphere show that **1-Mn** (a) and **1-Cu** (b) can be stable up to about 363 K.

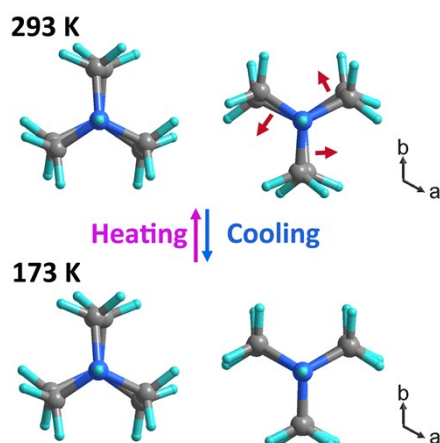

**Fig. S4** Twisting motion of the  $(\text{H}_2\text{dabco})^+$  cations for **1-Mn**. The asymmetric units of 293 and 173 K contain one  $(\text{H}_2\text{dabco})^+$  cation and two  $(\text{H}_2\text{dabco})^+$  cations, respectively. From 293 K to 173 K, the  $(\text{H}_2\text{dabco})^+$  cations exhibit obvious twisting motion (red arrows) along the  $c$ -axis.

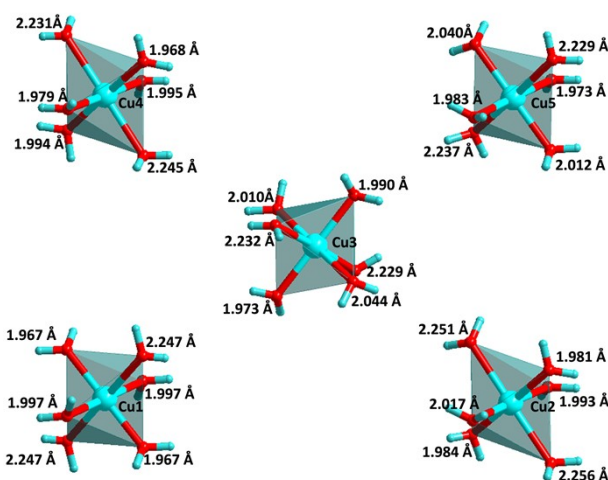

**Fig. S5** The five different  $[\text{Cu}(\text{H}_2\text{O})_6]^{2+}$  octahedra of **1-Cu** at 173 K.

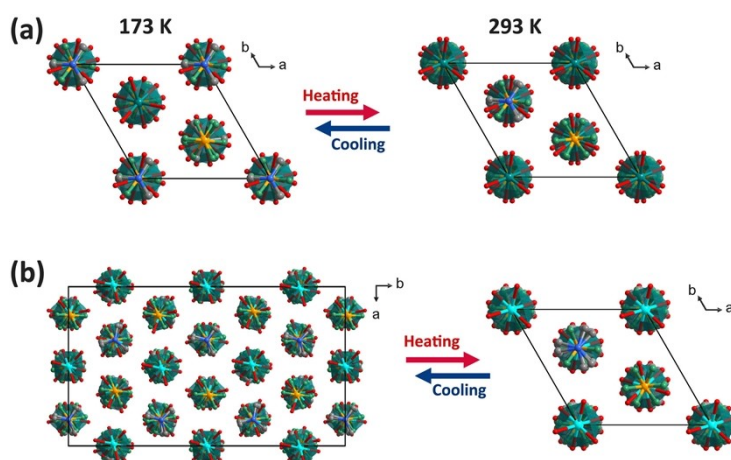

**Fig. S6** The packing structures viewed along the  $c$ -axis of **1-Mn** (a) and **1-Cu** (b) at 173 and 293 K.

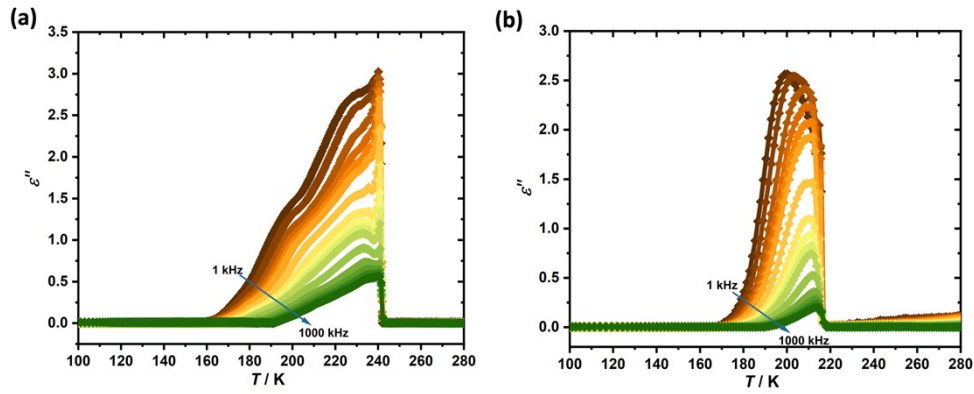

**Fig. S7** Imaginary part ( $\epsilon''$ ) of the dielectric permittivity of **1-Mn** (a) and **1-Cu** (b) as a function of temperature at various frequencies from 1 kHz to 1000 kHz on a cooling process measured with single crystals along to largest face (black arrows in the inset of Fig. S2).

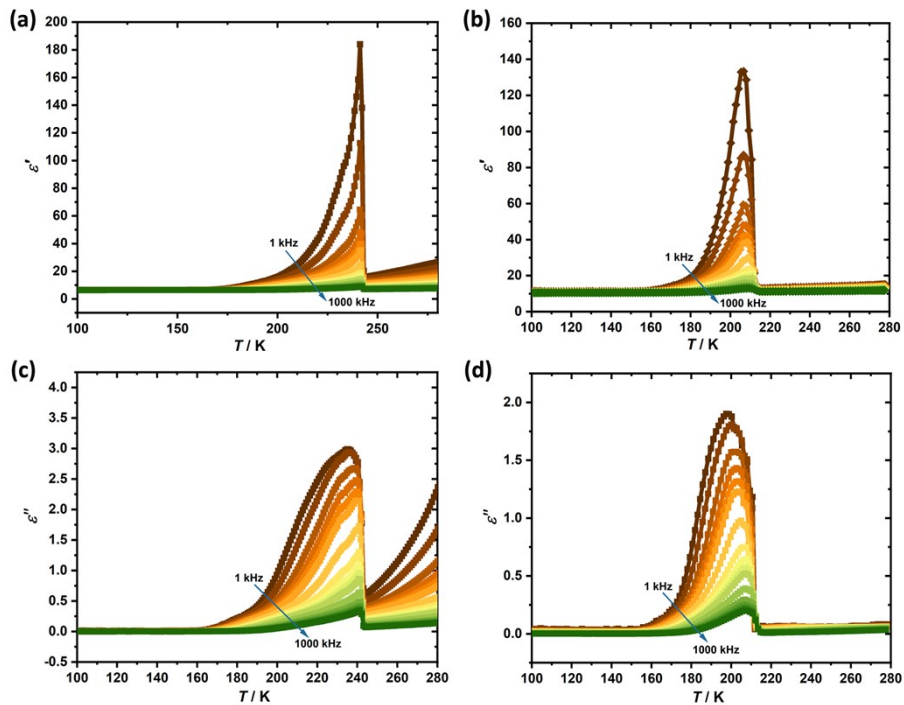

**Fig. S8** Real part ( $\epsilon'$ ) and imaginary part ( $\epsilon''$ ) of the dielectric permittivity of **1-Mn** (a & c) and **1-Cu** (b & d) as a function of temperature at various frequencies from 1 kHz to 1000 kHz on a cooling process measured with single crystals perpendicular to largest face (red arrows in the inset of Fig. S2).

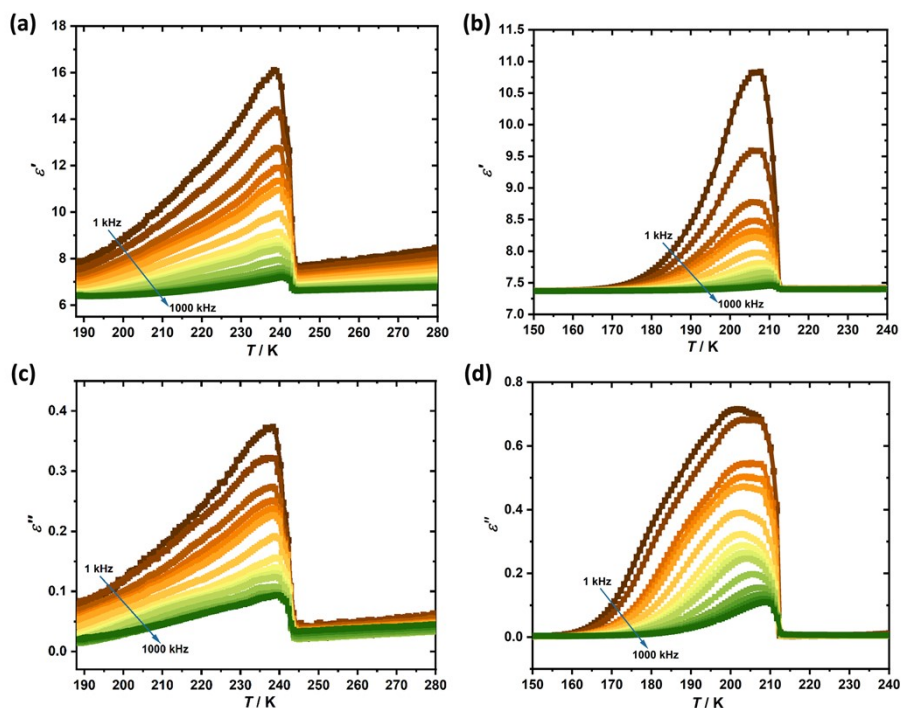

**Fig. S9** Real part ( $\epsilon'$ ) and imaginary part ( $\epsilon''$ ) of the dielectric permittivity of **1-Mn** (a & c) and **1-Cu** (b & d) as a function of temperature at various frequencies from 1 kHz to 1000 kHz on a cooling process measured with powder-pressed samples.

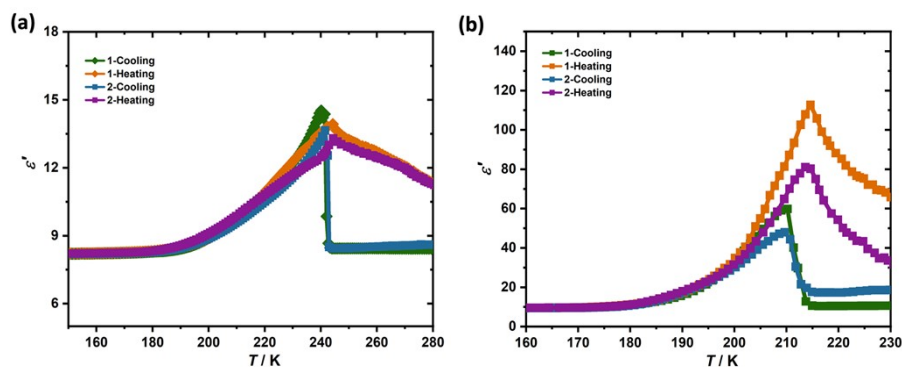

**Fig. S10** Two heating-cooling cycles of the dielectric constant of **1-Mn** (a, 1000 kHz) and **1-Cu** (b, 4 kHz) as a function of temperature.
